# Supplementary material
Source: PubMed Central journal article supplement (PMC2805907)
Supplement: NIHMS163437-supplement-01.pdf [file NIHMS163437-supplement-01.pdf]

## Supplemental Data

### AID Produces DNA Double-Strand Breaks in Non-Ig Genes and Mature B Cell Lymphomas with Reciprocal Chromosome Translocations

Davide F. Robbiani, Samuel Bunting, Niklas Feldhahn, Anne Bothmer, Jordi Camps, Stephanie Deroubaix, Kevin M. McBride, Isaac A. Klein, Gary Stone, Thomas R. Eisenreich, Thomas Ried, André Nussenzweig, and Michel C. Nussenzweig

#### Figure S1. Western Blot for AID Protein in Pre-B and Follicular B Cells

Twenty  $\mu$ g of protein lysates from sorted pre-B and follicular B cells of the indicated genotypes were assayed in each lane.

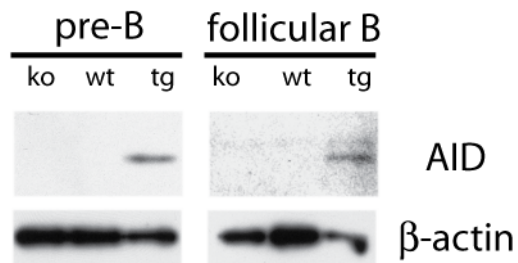

## Figure S2. B Cell Development in *IgκAID* Mice

Flow cytometric analysis of bone marrow leukocytes (A) and splenocytes (B) from age-matched wild type and *IgκAID* mice reveals normal B lymphocyte development in *IgκAID* mice. Immuno-staining was performed with the indicated markers. These figures are representative of three independent experiments.

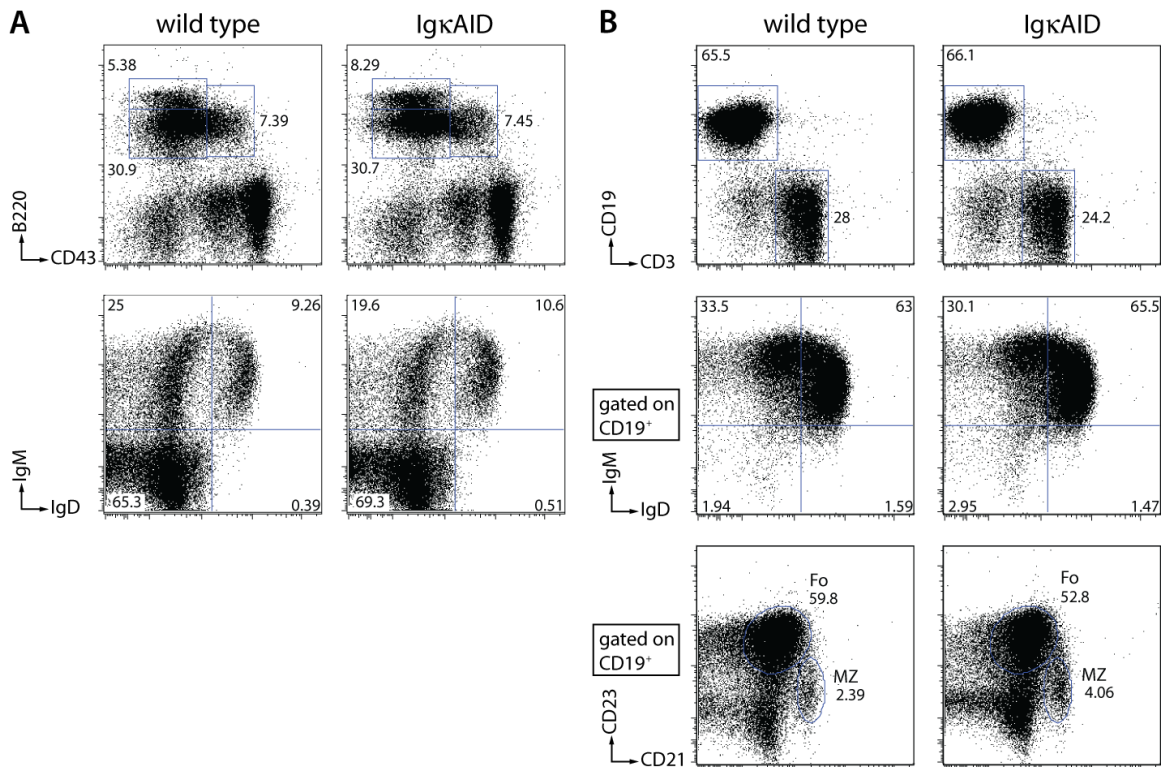

### Figure S3. Serum Ig Isotypes

Serum titers of matched 9 week old *IgκAID* and wild type mice were determined by ELISA as described (Dorsett et al., 2008).

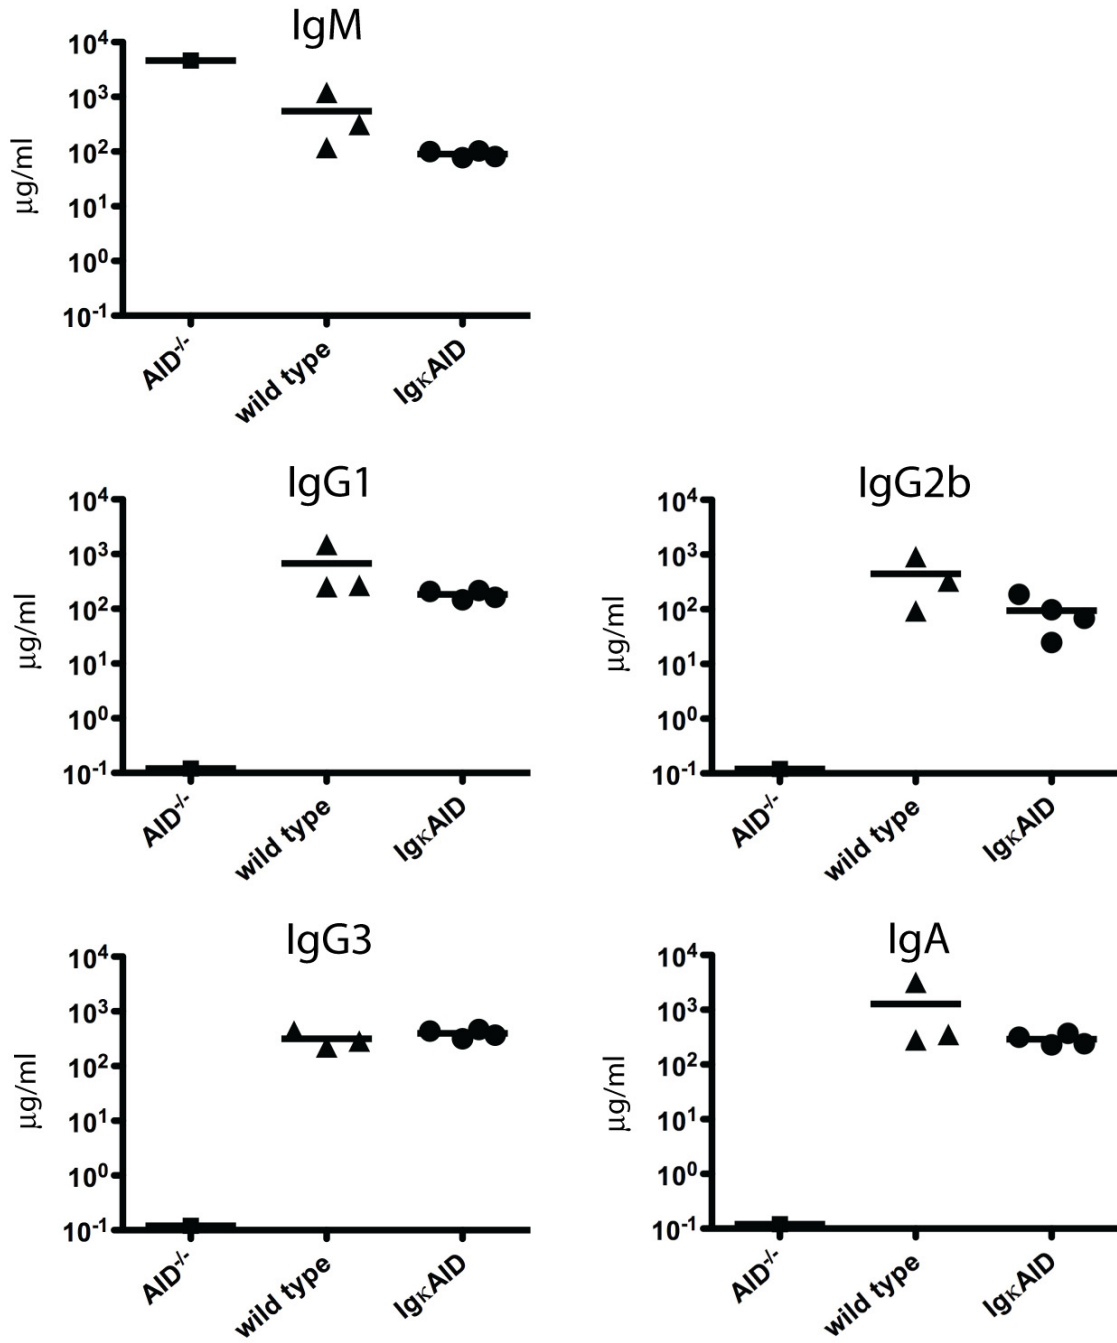

### Figure S4. AID Nontarget Genes Are Expressed in Activated B Cells

cDNA from wild type B cells activated *in vitro* with LPS and IL-4 for four days was amplified with cross-intronic primers for *Taci* (5-CGCCATCTTCTGCTGTTTCTTG-3 and 5-AGCAGAAGCTACACGTTTCCACA-3), *Whsc1* (5-CCCCCTCCTGCCTCCCTG-3 and 5-CGTCGTCAATGTCAAACCACG-3), *H2E $\alpha$*  (5-CCAGAGACCAGGATGCCGC-3 and 5-GTCCACCTTGGGGGTCAAAG-3), and *A20* (5- TGTGAAGATACGAGAGAGAACCCC-3 and 5-TGAAGAGGCAGATAAATCCCACC-3), resulting in amplicons of the expected sizes. gDNA is control genomic DNA from the same cells.

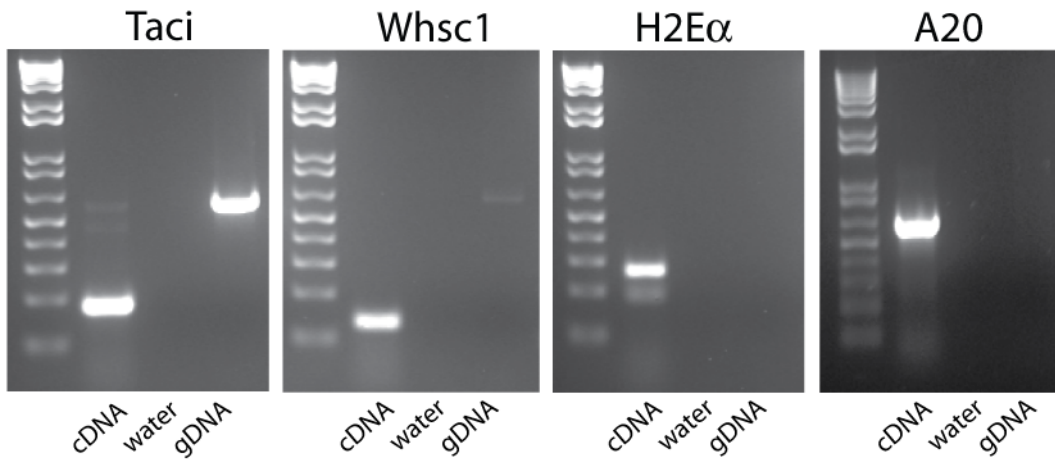

### Figure S5. *IgκAID/p53<sup>-/-</sup>* B Cell Lymphomas Are Heterogeneous in Phenotype

Flow cytometric analysis of representative *IgκAID/p53<sup>-/-</sup>* B cell lymphomas with distinct karyotypes. As a comparison, one CD4<sup>+</sup>CD8<sup>+</sup> T cell lymphoma from a p53<sup>-/-</sup> control mouse is shown at the bottom.

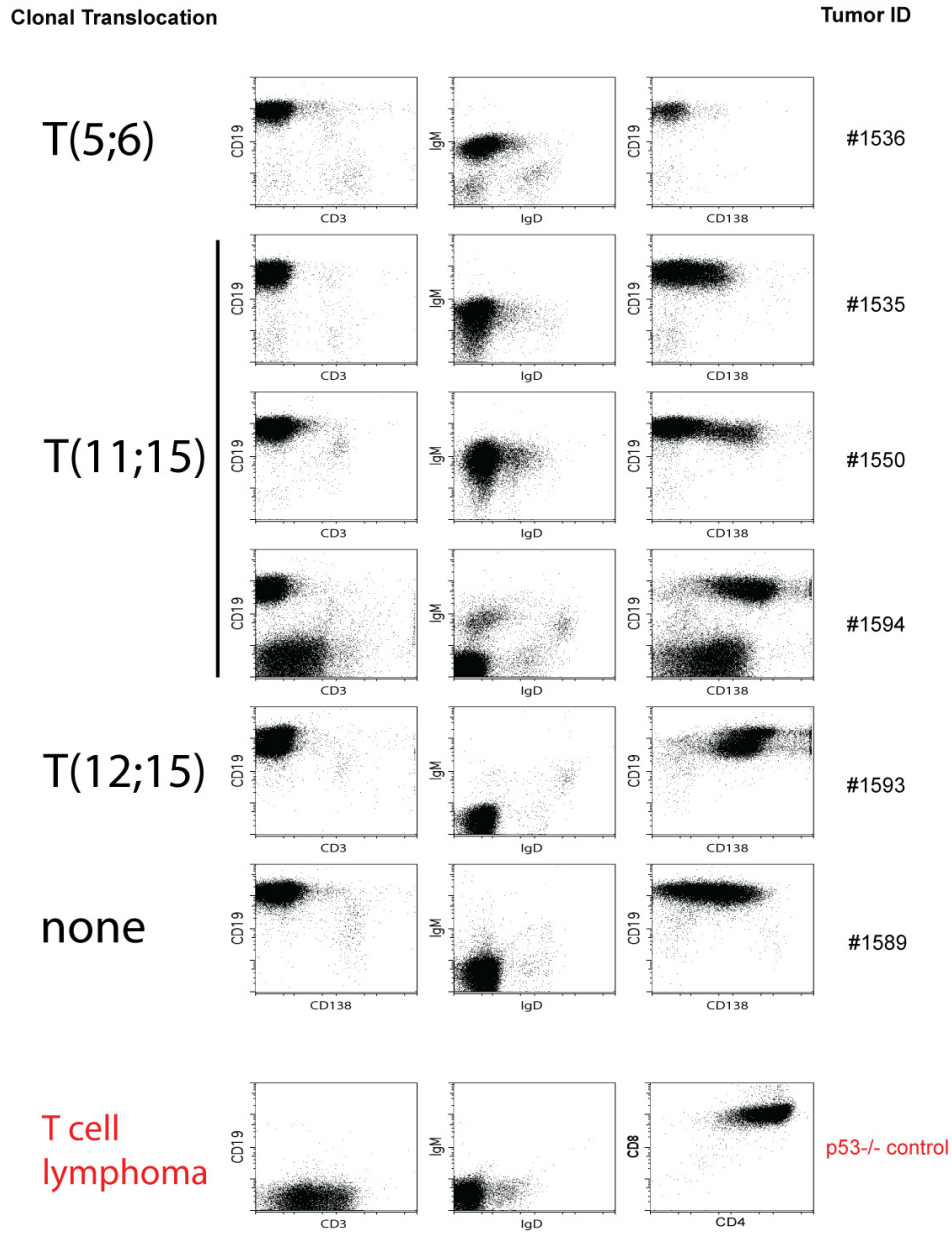

## Figure S6. Identification of the T(5;6) Translocation Partners

(A) and (B) aCGH analysis of sorted chromosomes identifies the breakpoint in *Anxa4* (Chr6) and *Wdfy3* (Chr5). (C) and (D) RT-PCR detects hybrid transcripts between *Anxa4* and *Wdfy3* from both derivative chromosomes.

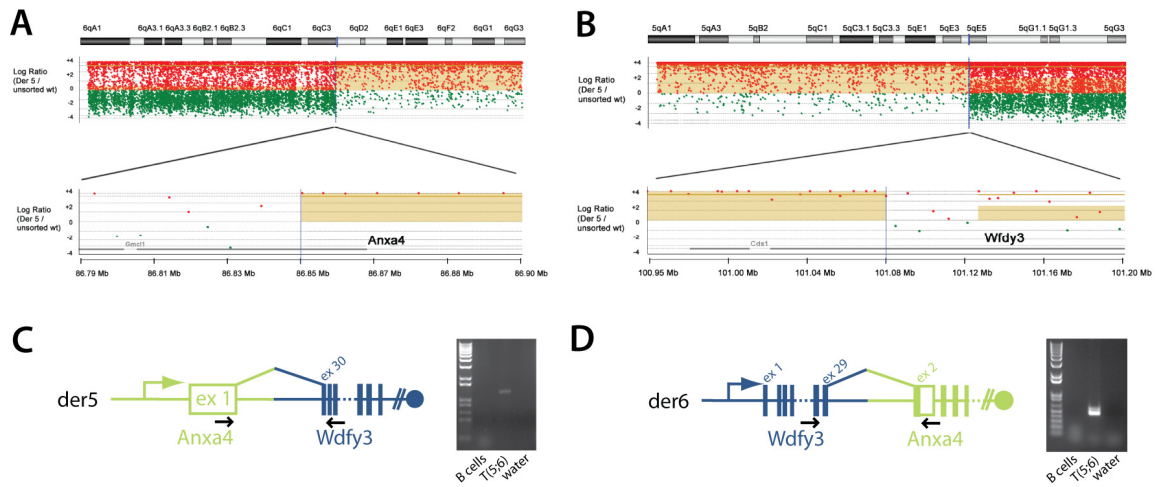

**Figure S7. Model for the Processing of DNA Lesions Mediated by AID Leading to Deletions or Duplications at the Derivative Chromosomes**

(A) AID induces a single-strand break (SSB), which is converted to a double-strand break (DSB). DNA ends are then resected prior to their joining to the translocation partner. The loss of nucleotides results in a deletion of sequence at the derivative chromosomes. (B) AID induces two SSBs. Single strands of DNA are filled-in and result in a duplication of sequence at the derivative chromosomes. See also Figure 4G and Supplemental Table S2.

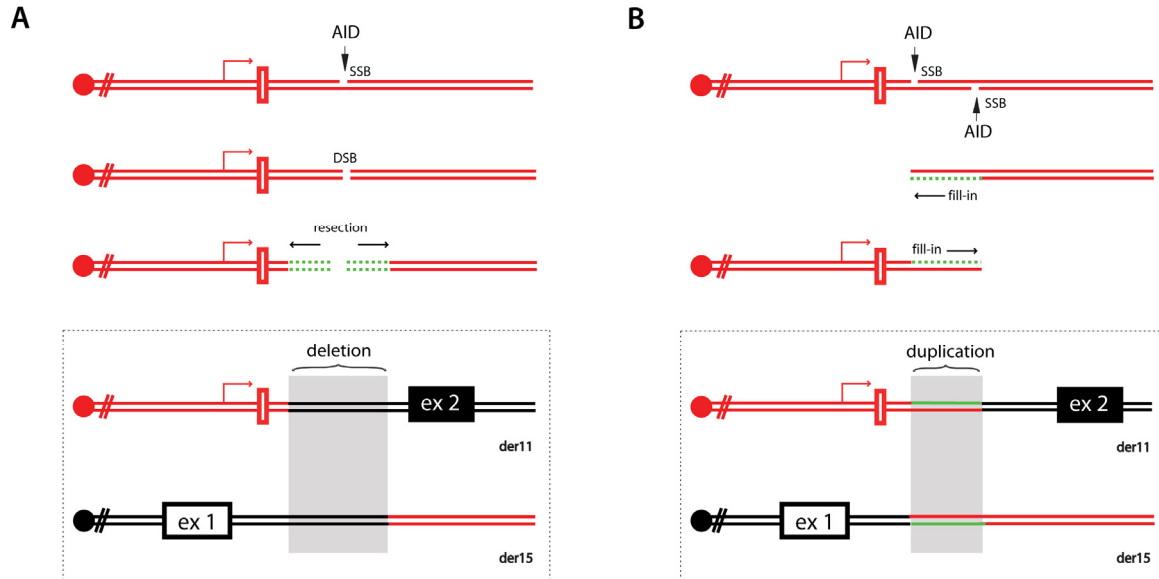

**Figure S8. *miR-142* Mutations in Primary B Cells**

Mutations at the *miR-142* locus (from Figure 5). Genotypes are color-coded, as indicated. Mutations from resting B cells are above, those from activated B cells are below the reference *miR-142* sequence (in black). Mutations from germinal center cells are bolded. Dashes indicate deletions. The *miR-142* sequence is boxed. DGYW/WRCH hotspots are underlined.

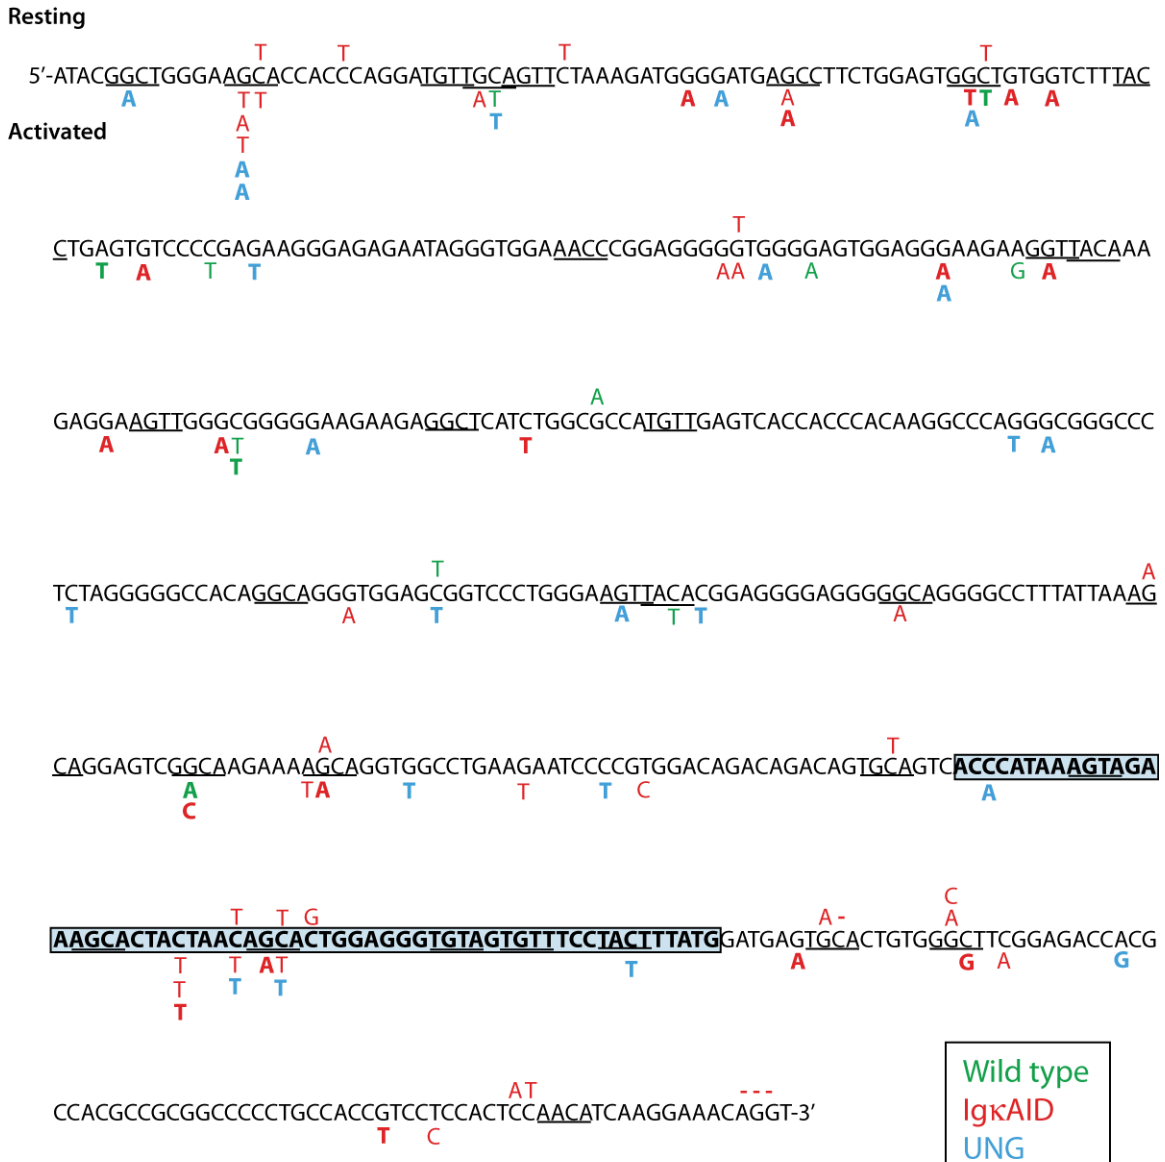



**Figure S9. *miR-142* Mutations at the Nontranslocated Allele in T(11;15)**

Mutations at the non-translocated *miR-142* allele of T(11;15) tumors (cumulative mutation rate:  $60 \times 10^{-4}$ ). The non-translocated allele was amplified with primers external to the breakpoint region (5-TTGTCGCTGGTTTCCTGTCAG-3 and 5-AGTCAATAGGATGGCTCTGTGGG-3) and sequenced with a primer proximal to the *miR-142* sequence (5-AATGAGGGCGTGTGAGAGATGCTC-3). A total of 14 tumors were analyzed. The *miR-142* sequence is boxed. DGYW/WRCH hotspots are underlined.

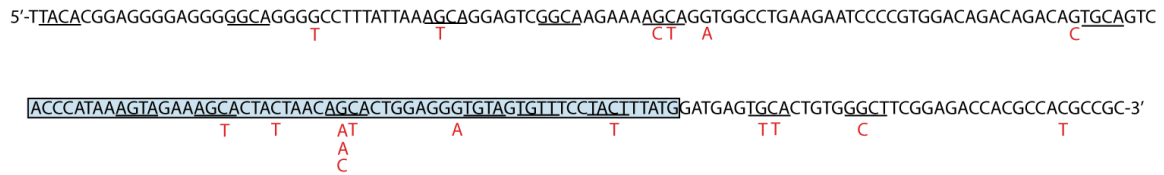

**Table S1**

Analysis of the breakpoints in *IgκAID/p53*<sup>-/-</sup> lymphomas. 50 nucleotides surrounding each breakpoint (middle) are shown, with the homology to germline sequence (top and bottom) indicated by vertical bars. Microhomologies are yellow; insertions green; point mutations bolded in red. Shadowed in light grey are extended microhomologies if single nucleotide gaps are tolerated. Red sequences are *miR-142*, green are *Anxa4* and blue are *Wdfy3*.

**T(12;15): der12 breakpoint**

```
IgH μ < CAGCTCAGCTCAGCCCAGCTCAGCTCAGCTCACCCAGCTCAGCTCACCC
          |
          |
#1593    CAGCTCAGCTCAGCCCAGCTCAGCAATGTGCCAGTCAACATAACTGTAC
          |
          |
c-myc   > GGGGGGGGGGTCGTTCGGAAAGAATGTGCCAGTCAACATAACTGTAC
```

**T(12;15): der15 breakpoint**

```
c-myc   > TTCTGGAAAGAATGTGCCAGTCAACATAACTGTACGACCAAAGGCAAAA
          |
          |
#1593    TTCTGGAAAGAATGTGCCAGTCAACCCCAACTCAGCTCAGCTCACCCCA
          |
          |
IgH μ < GCTCACCCAGCTCAGCTCAGCTCACCCAGCTCAGCTCAGCTCACCCCA
```

**T(11;15): der11 breakpoints**

```
miR-142 > AGGGTGTAGTGTTCCTACTTTATGGATGAGTGCAGTGTGGGCTTCGGAG
          |
          |
#1461    AGGGTGTAGTGTTCCTACTTTATGGGACCGACACGGAGGTGCGTCCCGC
          |
          |
c-myc   > AGCTTGGTGCATTTCTGACAGCTGGGACCGACACGGAGGTGCGTCCCGC
```

```
miR-142 > GGCCAGGCTCCCCGAAAGACCTTCA TGGCTCCCCAAAGCACGGTGTTC
          |
          |
#1550    GGCCAGGCTCCCCGAAAGACCTTCA CCCTGCACCCAGTGTGAATCGCTG
          |
          |
c-myc   > ACCCTCGGCGGGGAGAGGAAGACCCCTGCACCCAGTGTGAATCGCTG
```

```
miR-142 > GGATGGGTAAGGGTCACGGGGCCCTCAACACTAATAAAGAATGGACTGGT
          |
          |
#1561    GGATGGGTAAGGGTCACAGGGCCCTGATGT TACCGATTGCTTGACTTGGG
          |
          |
c-myc   > TGAGGAGAAGCAAATTTGGGACAGGGATGTGACCGATTGCTTGACTTGGG
```

```
miR-142 > GAAAGACCTTCATGGCTCCCCAAAGCACGGTGTTCCTGACCCCTGATA
          |
          |
#1583    GAAAGACCTTCATGGCTCCCCAAATTCGACTTACCAGTCTCTGAGAGG
          |
          |
c-myc   > TTTGGGAGCGAGAAGGCTCCGTAGCTTCTGACTTACCAGTCTCTGAGAGG
```

```
miR-142 > GCGGTCCCTGGGAAGTTACACGGAGGGGAGGGGCGGGCCTTATTAA
          |
          |
#1584    GCGGTCCCTGGGAAGTTACACGGAA TAGCTTAGCTGCTACCCTCGGCGGG
          |
          |
c-myc   > CGGTGAGTCGTGATCTGAGCGGTTCCGTAACAGCTGCTACCCTCGGCGGG
```

```
miR-142 > AAGGGAGCCGGATGGATGGGTAAGGGT CACGGGGCCCTCAACTAATAA
          |
          |
#1592    AAGGGAGCCGGATGGATGGGTAAGGGT TAGCGCAGTGAGGAGAAGCAAAT
          |
          |
c-myc   > CGGGCAGTACTAGACTTGATGTTGGCT TAGCGCAGTGAGGAGAAGCAAAT
```

---

miR-142 > TGGACAGACAGACAGTGCAGTCA**CC**CATAGAAAGCACTACTAACAGCACT  
 |||  
 #1595 TGGACAGACAGACAGTGCAGTCA**CC**CGCTGAAAGGGGAGTGGTTCAGGAT  
 |||  
 c-myc > CACACACACACTTGAAGTACAG**CA**CGCTGAAAGGGGAGTGGTTCAGGAT

---

miR-142 > AGCTGGGAACCTAACCCAGGGCT**TTGCGCTTACCATTGAGCTAAATCCCC**  
 |||  
 #1613 AGCTGGGAACCTAACCCAGGGCT**GG**AATTGGGACAGGGATGTGACCGATT  
 |||  
 c-myc > GGGCTAGCGCAGT**GAGGAGAAGCAAAAT**GGGACAGGGATGTGACCGATT

---

miR-142 > CTTGGGCCACCGGAAGTAGACT**TTGTAGCAACGTGAAGAAAGGGTATGAG**  
 |||  
 #1673 CTTGGGCCACCGGAAGTAGACT**TT**AGTCTTTCTTCCATTCTGTGCTTT  
 |||  
 c-myc > CTTGAATGTAGCGGCCGGTTAGGACAGTCTTTCTTCCATTCTGTGCTTT

---

miR-142 > GGGCCTTTATTAAAGCAGGAGT**CGGCA**AGAAAAGCAGGTGGCCTGAAGAA  
 |||  
 #1674 GGGCCTTTATTAAAGCAGGAGT**CGG**CCACACACACACACACACACACA  
 |||  
 c-myc > AAAAGAGTGCATGCCTCCCCCAA**CC**ACACACACACACACACACACA

---

miR-142 > GCTTCGGAGACCACGCCA**CGCCGCGGC**CCCCTGCCACCGTCTCCACTCC  
 |||  
 #1714 GCTTCGGAGACCACGCCA**CGCCGCGCA**TTAGGACTTGATGTTGGGCTAG  
 |||  
 c-myc > GTAAAATTTAAGCCTGAC**CCCGCGGC**ACTAGGACTTGATGTTGGGCTAG

### T(11;15): der15 breakpoints

---

c-myc > ACCGACACGGAGGTGCGTCCCGCCCGCCAATCCCCGGCGGCGATCGCAAC  
 |||  
 #1461 ACCGACACGGAGGTGCGTCCCGC**AC**CCTTTATTAAAGCAGGAGTCGGCAA  
 |||

miR-142 > TTACACGGAGGGGAGGGG**CC**AGGGCC**TTATTAAAGCAGGAGTCGGCAA**

---

c-myc > GGGAAATTTTGTCTATTTGGG**GA**CAGTGTCTCTGCCTCTGCCCGGATC  
 |||  
 #1535 GGGAAATTTTGTCTATTTGGG**GA**GAGTAGGGAGGAGTTGCGAGAGTGGGA  
 |||

miR-142 > AGCTCTTAGGGAGGAGGG**CCAGAGAGT**AGGGAGGAGTTGCGAGAGTGGGA

---

c-myc > GAGAAGGCTCCGTAGCTTCTGACT**TTACC**AGTCTCTGAGAGGGCATTAA  
 |||  
 #1583 GAGAAGGCTCCGT**A**CTTCTGACT**TTACC**CCTGATACTTGGGAGACACCA  
 |||

miR-142 > CTCCCCAAAGCACGGT**GTCTCTGACC**CCTGATACTTGGGAGACACCA

---

c-myc > AAGACTGCGGTGAGTCGTGATCT**GA**GCGGTTCCGTAACAGCTGCTACCCT  
 |||  
 #1584 AAGACTGCGGTGAGTCGTGATCT**GA**ATCCCCGTGGACAGACAGACAGTGC  
 |||

miR-142 > GCAAGAAAAGCAGGTGGCCT**GAA**GAATCCCCGTGGACAGACAGACAGTGC

---

c-myc > GCACTAGGACTTGATGTTGGGCT**AGCG**CAGTGAGGAGAAGCAAAATTGGG  
 |||  
 #1592 GCACTAGGACTTGATGTTGGGCT**AGC**ACTAATAAAGAATGGACTGGTTTC  
 |||

miR-142 > TGGGTAAGGGT**CACGGG**CCCT**CA**CACTAATAAAGAATGGACTGGTTTC

---

```

c-myc      > GCTGACGCTGACCCGGCCGGTTGGACATTCTTGCTTTGCTACATTAATTG
#1594      GCTGACGCTGACCCGGCCGGTTGGACCCAGAGAGTAGGGAGGAGTTGCGAG
miR-142    > AGTCTCTAGCTCTTAGGGAGGAGGCCAGAGAGTAGGGAGGAGTTGCGAG

c-myc      > AAGGCTCCGTAGCTTCTGACTTACCAGTCTCTGAGAGGGCATTAAATTT
#1613      AAGGCTCCGTAGCTTCTGACTTACGCTAAATCCCCAACCCCATCTTTTAA
miR-142    > CCAGGGCTTTGCGCTTACCATTGAGCTAAATCCCCAACCCCATCTTTTAA

c-myc      > TTTGAAGCGGGTTCCCGAGGTTACTATGGGCTGACGCTGACCCGGCCGG
#1673      TTTGAAGCGGGTTCCCGAGGTTACGTAAAAATGGTTGTCTGCCTCCCAA
miR-142    > GTTTTCTGATGGTCTTGAGTGGCCCTGTAAAAGGGTTGTCTGCCTCCCAA

c-myc      > AAAAATAGTGATCGTAGTAAAATTAAAGCCTGACCCCGCGGCACTAGGA
#1674      AAAAATAGTGATCGTAGTAAAATTGTGTCCAGGCATTTTTCACGCAA
miR-142    > ACAGTGAGACTGGTATCGGCAAGTGGTGCACAGGCATTTTTCACGCAA

c-myc      > GTGTAGAAGGGAGGTGTCTCTTAATTATTGACACCCCTCCCTTTTATT
#1676      GTGTAGAAGGGAGGTGTCTCTTAATTCGGAGACCACGCCACGCCGCGGCC
miR-142    > TTATGGATGAGTGCCTGTGGCTTCGGAGACCACGCCACGCCGCGGCC

c-myc      > TGATCGTAGTAAAATTTAAGCCTGACCCCGCGGCACTAGGACTTGATGT
#1714      TGATCGTAGTAAAATTTAAGCCTGAGTGTGACTGTGGGCTTCGGAGACCAC
miR-142    > GTAGTGTTCCTACTTTATGGAATGAGTGTGACTGTGGGCTTCGGAGACCAC

```

### T(5;6): der5 breakpoint

```

Anxa4      > CACATAGAGAACATGGGATCTGAATGAAGACCTTTTGCTCCCATGCAAGT
#1536      CACATAGAGAACATGGGATCTGAATTCACACTTTTAACTACTTGAAGAG
Wdfy3      > TTTAGCAACCAGGGTATGATTTTGCTCACACTTTTAACTACTTGAAGAG

```

### T(5;6): der6 breakpoint

```

Wdfy3      > CAGGGTATGATTTTGCTCACACTTTTAACTACTTGAAGAGGAATCTTA
#1536      CAGGGTATGATTTTGCTCACACTTTTGTCTCCCATGCAAGTGACCTGGAC
Anxa4      > AACATGGGATCTGAATGAGACCTTTTGCTCCCATGCAAGTGACCTGGAC

```

### Table S2

Analysis of loss or gain of sequence at the breakpoints in *IgκAID/p53<sup>-/-</sup>* lymphomas. Nucleotides surrounding each breakpoint are shown, with the homology of either derivative chromosomes (top and bottom) to germline sequence (middle) indicated by vertical bars. Insertions are underlined. Red sequences are *miR-142*, green are *Anxa4* and blue are *Wdfy3*.

T(12;15): #1593

16 bp duplication in c-myc

```

der15  ...GGGGGGGGTTCGTTCTGGAAGAATGTGCCAGTCAACCCCAACTCAGCTCAGCTCAGCTCAGCT...
      | | | | | | | | | | | | | | | | | | | | | | | | | | | | | | | | | |
c-myc  ...GGGGGGGGTTCGTTCTGGAAGAATGTGCCAGTCAACATAACTGTACTAACTGTACGAC...
      | | | | | | | | | | | | | | | | | | | | | | | | | | | | | | | | | |
der12  ...GCTCAGCTCAGCCAGCTCAGCAATGTGCCAGTCAACATAACTGTACTAACTGTACGAC...

```

362 bp deletion in IgH-Sμ

```

der15  ...GGGGGGGGGGTTCGTTCTGGAAGAATGTGCCAGTCAACCCCAACTCAGCTCAGCTCAGCTCAG...
      | | | | | | | | | | | | | | | | | | | | | | | | | | | | | | | | | |
IgH-Sμ ...CAGCTCAGCTCAGCCAGCTCAGCTCAGCTCAGCTC...GCTCACCCAGCTCAGCTCAGCTCAG...
      | | | | | | | | | | | | | | | | | | | | | | | | | | | | | | | | | |
der12  ...CAGCTCAGCTCAGCCAGCTCAGCAATGTGCCAGTCAACATAACTGTACTAACTGTACGAC...

```

T(11;15): #1461

27 bp duplication in c-myc

```

der15  ...GTGCATTTCTGACAGCCTGGGACCGACACGGAGGTGCGTCCCGCACCCCTTTATTAAAGC...
      | | | | | | | | | | | | | | | | | | | | | | | | | | | | | | | | | |
c-myc  ...GTGCATTTCTGACAGCCTGGGACCGACACGGAGGTGCGTCCCGCCCGCCAATCCCCGGC...
      | | | | | | | | | | | | | | | | | | | | | | | | | | | | | | | | | |
der11  ...TAGTGTTCCTACTTTATGGGACCGACACGGAGGTGCGTCCCGCCCGCCAATCCCCGGC...

```

136 bp duplication in miR-142

```

der15  ...ACACGGAGGTGCGTCCCGCACCCCTTTATTA...ACTTTATGGATGAGTGCAGCTGTGGGC...
      | | | | | | | | | | | | | | | | | | | | | | | | | | | | | | | | | |
miR-142 ...CACGGAGGGAGGGGGCCAGGGGCTTTATTA...ACTTTATGGATGAGTGCAGCTGTGGGC...
      | | | | | | | | | | | | | | | | | | | | | | | | | | | | | | | | | |
der11  ...CACGGAGGGAGGGGGCCAGGGGCTTTATTA...ACTTTATGGGACCGACACGGAGGTGC...

```

T(11;15): #1583

12 bp duplication in c-myc

```

der15  ...TTTGGGAGCGAGAAGGCTCCGTAACCTTCTGACTTACCCTTGATACTGGGGAGACCA...
      | | | | | | | | | | | | | | | | | | | | | | | | | | | | | | | | | |
c-myc  ...TTTGGGAGCGAGAAGGCTCCGTAGCTTCTGACTTACCAGTCTCTGAGAGGGCATTTAAA...
      | | | | | | | | | | | | | | | | | | | | | | | | | | | | | | | | | |
der11  ...GAAAGACCTTCATGGCTCCCCAAATTTCTGACTTACCAGTCTCTGAGAGGGCATTTAAA...

```

15 bp deletion in miR-142

```

der15  ...GCGTTTGGGAGCGAGAAGGCTCCGTAACCTTCTGACTTACCCTTGATACTGGGGAGACA...
      | | | | | | | | | | | | | | | | | | | | | | | | | | | | | | | | | |
miR-142 ...AGACCTTCATGGCTCCCCAAAGCACGGTGCTTCTGACCCCTGATACTTGGGGAGACA...
      | | | | | | | | | | | | | | | | | | | | | | | | | | | | | | | | | |
der11  ...AGACCTTCATGGCTCCCCAAATTTCTGACTTACCAGTCTCTGAGAGGGCATTTAAATTT...

```

T(11;15): #1584

13 bp deletion in c-myc

```
der15    ...GACTGCGGTGAGTCGTGATCTGAATCCCGTGGACAGACAGAGTGCAGTCACCCATAA...
          |||
c-myc    ...GACTGCGGTGAGTCGTGATCTGAGCGGTTCCGTAACAGCTGCTACCCTCGGCGGGGAGAG...
          |||
der11    ...GTGGAGCGGTCCCTGGGAAGTTACACGGAATAGCTTAGCTGCTACCCTCGGCGGGGAGAG...
```

60 bp deletion in miR-142

```
der15    ...CGCCCCTGAATTGCTAGGAAGACTGCGGTGAGTCGTGATCTGAATCCCGTGGACAGACA...
          |||
miR-142  ...TCCCTGGGAAGTTACACGGAGGGGAGGGG...TGGCCTGAAGAATCCCGTGGACAGACA...
          |||
der11    ...TCCCTGGGAAGTTACACGGAATAGCTTAGCTGCTACCCTCGGCGGGGAGAGGAAGACGC...
```

---

T(11;15): #1592

4 bp duplication in c-myc

```
der15    ...ACCCCCGCGGCACTAGGACTTGATGTTGGGCTAGCACTAATAAAGAAATGGACTGGTTTC...
          |||
c-myc    ...ACCCCCGCGGCACTAGGACTTGATGTTGGGCTAGCGCAGTGAGGAGAAGCAAATTTGGG...
          |||
der11    ...TCGAGAAGGGAGCCGGATGGATGGGTAAGGCTAGCGCAGTGAGGAGAAGCAAATTTGGG...
```

14 bp deletion in miR-142

```
der15    ...GACCCCCGCGGCACTAGGACTTGATGTTGGGCTAGCACTAATAAAGAAATGGACGGTTTC...
          |||
miR-142  ...GCCGGATGGATGGGTAAGGGTACGGGGCCCTCAACACTAATAAAGAAATGGACGGTTTC...
          |||
der11    ...GCCGGATGGATGGGTAAGGGTAGCGCAGTGAGGAGAAGCAAATTTGGACAGGGATGTG...
```

---

T(11;15): #1613

227 bp deletion in c-myc

```
der15    ...AAGGCTCCGTAGCTTCTGACTTACGCTAAATCCCCAACCCATCTTTTAAATCTACAGAAT...
          |||
c-myc    ...AAGGCTCCGTAGCTTCTGACTTACCAGTCT...AGCAAATTTGGGACAGGGATGTGACCG...
          |||
der11    ...TGTTTTTGGGAAGCTGGGAACCTAACCCAGGGCTGCAATTGGGACAGGGATGTGACCG...
```

16 bp deletion in miR-142

```
der15    ...GCGTTTGGGAGCGAGAAGGCTCCGTAGCTTCTGACTTACGCTAAATCCCCAACCCATCT...
          |||
miR-142  ...AGCTGGGAACCTAACCCAGGGCTTTGCGCTTACCATTGAGCTAAATCCCCAACCCATCT...
          |||
der11    ...AGCTGGGAACCTAACCCAGGGCTGGAATTGGGACAGGGATGTGACCGATTCTTGACTTG...
```

T(11;15): #1673

159 bp duplication in c-myc

```
der15    ...AATGTAGCGGCCGGTTAGGACAGTCTTT..AGGTTACCGTAAAATGGTTGTCTGCCTCC...
          |||
c-myc    ...AATGTAGCGGCCGGTTAGGACAGTCTTT..AGGTTACTATGGGCTGACGCTGACCCGGC...
          |||
der11    ...GGCCACCGGAAGTAGACTTTAAGTCTTT..AGGTTACTATGGGCTGACGCTGACCCGGC...
```

304 bp deletion in miR-142

```
der15    ...AACCGGATGCATTTTGAAGCGGGTCCCGAGGTACC GTAAAATGGTTGTCTGCCTCC...
          |||
miR-142  ...GGCCACCGGAAGTAGACTTTGTAGCAAC..TGGCCCTGTAAAAGGGTTGTCTGCCTCC...
          |||
der11    ...GGCCACCGGAAGTAGACTTTAAGTCTTTCTCCATTCCCTGTGCTTTTGACACTTTTCTC...
```

---

T(11;15): #1674

802 bp deletion in c-myc

```
der15    ...ATAGTGATCGTAGTAAAATT CGTGTCCAGGCATTTTTCACGCAACATGGCCGCAATTC...
          |||
c-myc    ...ATAGTGATCGTAGTAAAATTTAAGCCTGA..CCCCCAACCACACACACACACACAC...
          |||
der11    ...AGGGGAGGGGGCAGGGCCCTTTATTAAAGGCAGGAGTCGCCACACACACACACACAC...
```

544 bp duplication in miR-142

```
der15    ...GTGATCGTAGTAAAATT CGTGTCCAGG..GAGTCGGCAAGAAAAGCAGGTGGCCTGAAG...
          |||
miR-142  ...GACTGGTATCGGCAAGTGGTGCCAGG..GAGTCGGCAAGAAAAGCAGGTGGCCTGAAG...
          |||
der11    ...GACTGGTATCGGCAAGTGGTGCCAGG..GAGTCGGCCACACACACACACACACACA...
```

---

T(11;15); #1714

3 bp deletion in c-myc

```
der15    ...TAGTGATCGTAGTAAAATTTAAGCCTGAGTGCACTGTGGGCTTCGGAGACCACGCCACGC...
          |||
c-myc    ...TAGTGATCGTAGTAAAATTTAAGCCTGACCCCGCGGCACCTAGGACTTGATGTTGGGCTA...
          |||
der11    ...GTGCACTGTGGGCTTCGGAGACCACGCCACGCCCGGCATTAGGACTTGATGTTGGGCTA...
```

41 bp duplication in miR-142

```
der15    ...AATTTAAGCCTGAGTGCACTGTGGGCTTCGGAGACCACGCCACGCCCGGGCCCCCTGCCA...
          |||
miR-142  ...ACTTTATGGATGAGTGCACTGTGGGCTTCGGAGACCACGCCACGCCCGGGCCCCCTGCCA...
          |||
der11    ...ACTTTATGGATGAGTGCACTGTGGGCTTCGGAGACCACGCCACGCCCGGGCATTAGGACT...
```

T(5;6): #1536

4 bp deletion in Anxa4

```
der5      ...CCACATAGAGAACATGGGATCTGAATTCACACTTTTAACTACTTGGAGAGGAATTCTTA...
          |||
Anxa4     ...CCACATAGAGAACATGGGATCTGAATGAAGACCTTTTGCTCCCATGCAAGTGACCTGGAC...
          |||
der6      ...TTTAGCAACCAGGGTATGATTTGCTCACACCTTTTGCTCCCATGCAAGTGACCTGGAC...
```

6 bp duplication in Wdfy3

```
der5      ...GGTACCACATAGAGAACATGGGATCTGAATTCACACTTTTAACTACTTGGAGAGGAATT...
          |||
Wdfy3     ...CGATTTTAGCAACCAGGGTATGATTTGCTCACACTTTTAACTACTTGGAGAGGAATT...
          |||
der6      ...CGATTTTAGCAACCAGGGTATGATTTGCTCACACCTTTTGCTCCCATGCAAGTGACCT...
```

---



**Table S3**

Chromosome aberrations detected in wild type (n=500) and in 250 additional *IgkAID* primary B cells (see Figure 6).

| <b>Metaphase ID</b> | <b>wild type</b>                                          |
|---------------------|-----------------------------------------------------------|
| 1                   | <i>T(3;11), Dic(8;8)</i>                                  |
| 2                   | <i>T(5;6)</i>                                             |
| 3                   | <i>Reciprocal T(18;19)</i>                                |
|                     |                                                           |
| <b>Metaphase ID</b> | <b><i>IgkAID</i></b>                                      |
| 12                  | Dic(12;16)                                                |
| 13                  | T(12;13)                                                  |
| 14                  | Dic(12;16)                                                |
| 15                  | T(10;12), Dic(10;12)                                      |
| 16                  | T(9;16), T(3;4), T(11;17), Dic(4;11), Dic(3;4), Dic(7;19) |
| 17                  | T(2;16)                                                   |
| 18                  | T(2;12)                                                   |
| 19                  | T(12;16)                                                  |
| 20                  | Dic(4;11)                                                 |
| 21                  | T(8;16), Dic(4;11)                                        |
| 22                  | Dic(11;15)                                                |
| 23                  | Dic(13;13)                                                |
| 24                  | T(1;13)                                                   |
| 25                  | T(13;17), Dic(12;13)                                      |
| 26                  | T(2;13)                                                   |

**Table S4**

Summary of sequence information (unique mutations/sequenced nucleotides).  
The number of independent reads is indicated in parentheses.

|                                       | IgV <sub>H</sub> | S <sub>μ</sub>    | c-myc              | Taci            | Whsc1           | H2Eα            | A20             | miR-142           | Anxa4           | Wdfy3           |
|---------------------------------------|------------------|-------------------|--------------------|-----------------|-----------------|-----------------|-----------------|-------------------|-----------------|-----------------|
| AID <sup>-/-</sup><br>resting         | 1/40860<br>(90)  | 2/26600<br>(50)   | 5/70225<br>(84)    | n.d.            | n.d.            | n.d.            | n.d.            | 1/42450<br>(75)   | n.d.            | n.d.            |
| AID <sup>-/-</sup><br>activated       | 1/19068<br>(42)  | 1/50008<br>(94)   | 7/77325<br>(94)    | n.d.            | n.d.            | n.d.            | n.d.            | 9/105842<br>(187) | n.d.            | n.d.            |
| Wild type<br>resting                  | 1/40406<br>(89)  | 7/50540<br>(95)   | 6/80595<br>(93)    | n.d.            | n.d.            | n.d.            | n.d.            | 2/52638<br>(93)   | n.d.            | n.d.            |
| Wild type<br>activated                | 2/37682<br>(83)  | 7/45752<br>(86)   | 3/46500<br>(93)    | 1/47150<br>(82) | n.d.            | n.d.            | n.d.            | 6/45280<br>(90)   | n.d.            | n.d.            |
| IgκAID<br>resting                     | 30/39952<br>(88) | 235/46284<br>(87) | 3/42140<br>(68)    | n.d.            | n.d.            | n.d.            | n.d.            | 20/44148<br>(78)  | n.d.            | n.d.            |
| IgκAID<br>activated                   | 32/40406<br>(89) | 258/44688<br>(84) | 21/148210<br>(178) | 0/50025<br>(87) | 1/53768<br>(94) | 1/32289<br>(47) | 2/43200<br>(48) | 19/24338<br>(38)  | 2/72354<br>(93) | 2/59432<br>(92) |
|                                       |                  |                   |                    |                 |                 |                 |                 |                   |                 |                 |
| AID <sup>-/-</sup><br>germinal center | n.d.             | n.d.              | 3/75938<br>(86)    | n.d.            | n.d.            | n.d.            | n.d.            | 5/22074<br>(39)   | n.d.            | n.d.            |
| Wild type<br>Germinal center          | n.d.             | n.d.              | 3/51392<br>(60)    | n.d.            | n.d.            | n.d.            | n.d.            | 4/47544<br>(84)   | n.d.            | n.d.            |
| IgκAID<br>Germinal center             | n.d.             | n.d.              | 45/82087<br>(94)   | n.d.            | n.d.            | n.d.            | n.d.            | 18/23772<br>(42)  | n.d.            | n.d.            |
| UNG <sup>-/-</sup><br>Germinal center | n.d.             | n.d.              | 21/73494<br>(84)   | n.d.            | n.d.            | n.d.            | n.d.            | 23/49242<br>(87)  | n.d.            | n.d.            |

n.d. = not determined
